# Supplementary material for: Coronavirus M Protein Trafficking in Epithelial Cells Utilizes a Myosin Vb Splice Variant and Rab10
Source: MDPI journal article supplement (doi:10.3390/cells13020126), 2024-01-10
Supplement: s1 [file s1]

## SUPPLEMENTAL FIGURES

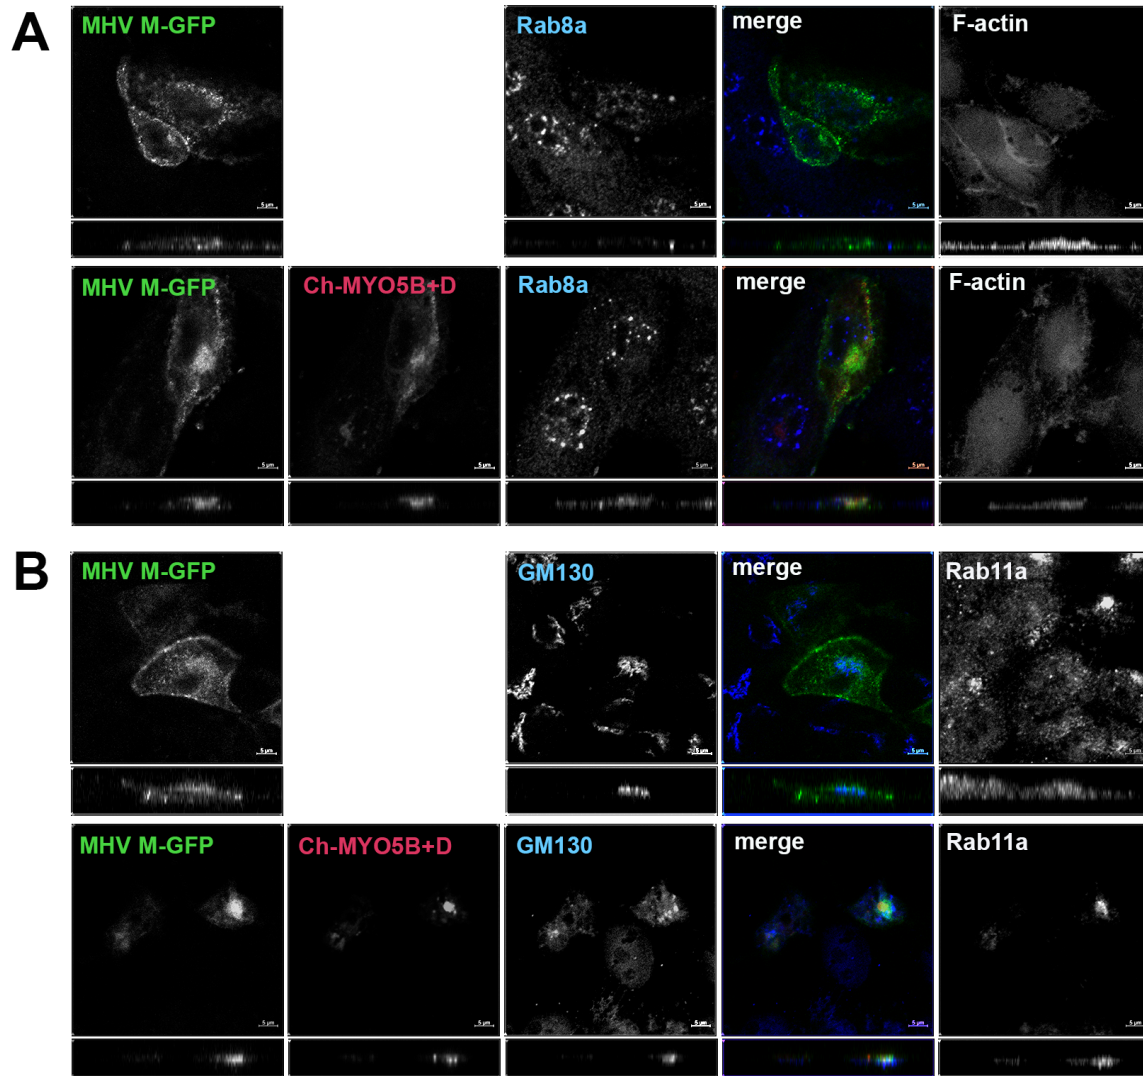

**Supplemental Figure S1: Localization of MHV M-GFP with Cherry-MYO5B+D with Rab8a and the Golgi apparatus.** A. Expression of MHV M-GFP alone and with Cherry-MYO5B+D in MDCK cells with immunostaining for endogenous Rab8a (cyan) and F-actin (Phalloidin, blue). B. Expression of MHV M-GFP alone and with Cherry-MYO5B+D in MDCK cells with immunostaining for endogenous Rab11a (cyan) and GM130 (blue) as a marker of the Golgi apparatus. Z axis projections are shown below X-Y slice images, with the merged overlap at the right. Bar = 5  $\mu$ m. Results are representative of 3 individual experiments.

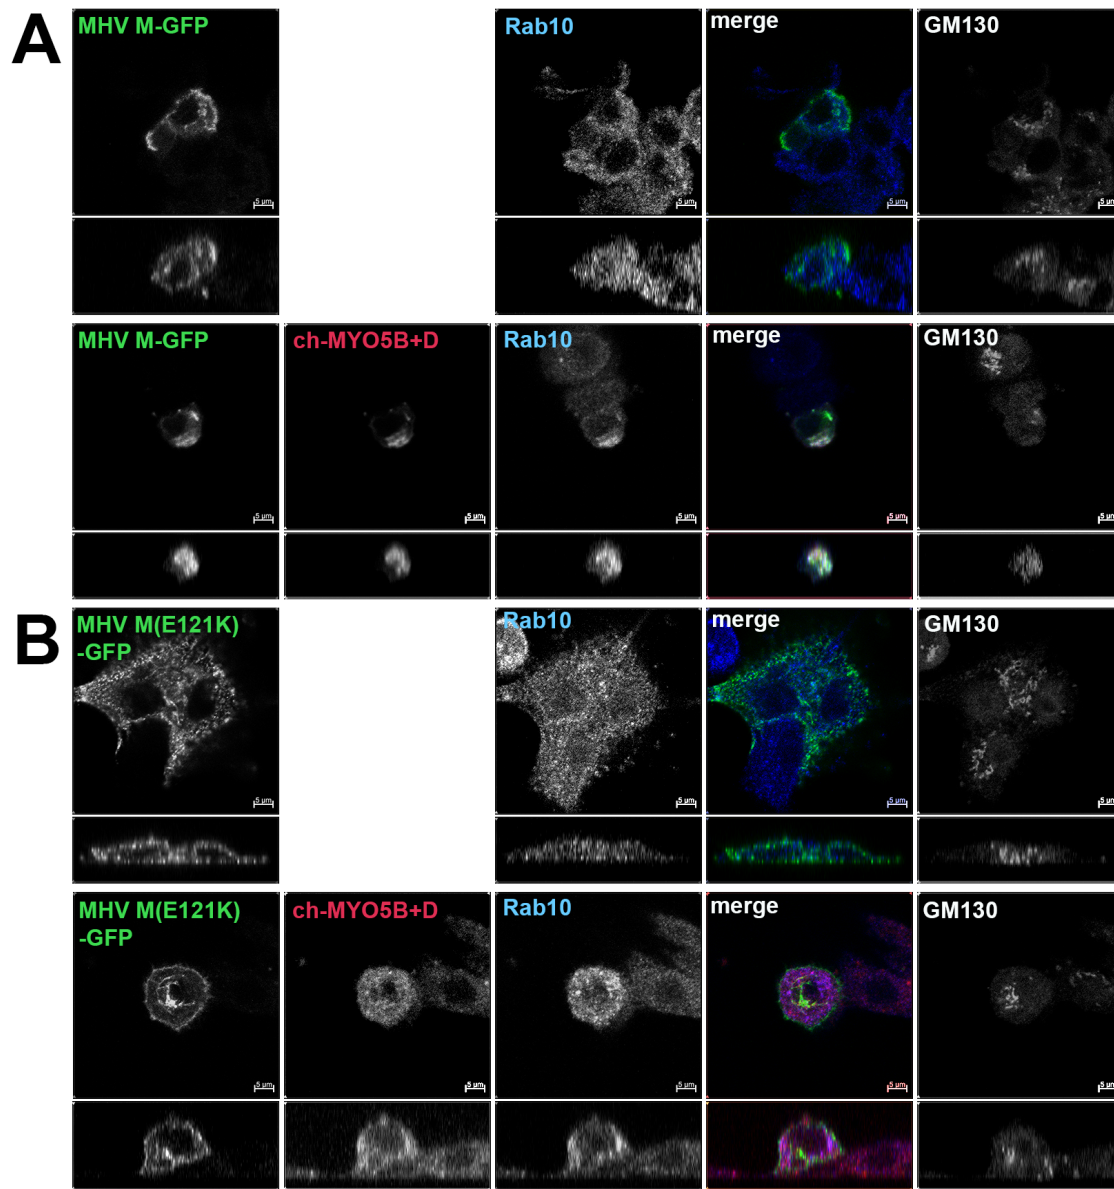

**Supplemental Figure S2: E121K point mutant in MHV M cytoplasmic tail blocks co-localization with co-expressed Cherry-MYO5B+D in A549 cells.** A549 lung cells were transfected with A) MHV M-GFP or B) MHV M(E121K)-GFP without or with MYO5B+D. All cells were co-immunostained for endogenous Rab10 and GM130 as a marker of the Golgi apparatus. Labels on the individual panels indicate the color used to produce the three-color merged image. Panels to the right of the merged panel were not used in the production of the merged image. Z axis projections are shown below X-Y slice images, with the merged overlap at the right. Bar = 5  $\mu$ m. Results are representative of 3 individual experiments.

**A**

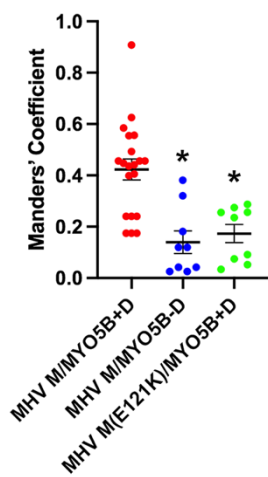

**B**

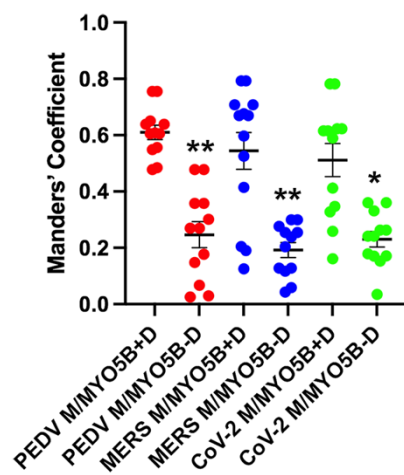

**C**

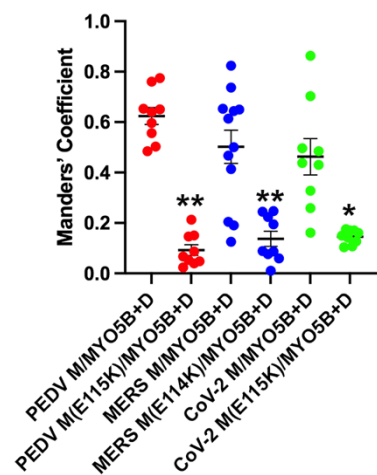

**Supplemental Figure S3: Colocalization analysis for dual expression of M proteins with MYO5B in A549 cells.** 3-dimensional Manders' coefficients were calculated for Z-stack images for dually transfected A549 cells. Dual expression pairs are noted on the X-axis. A. MHV M-GFP expression with MYO5B+D or MYO5B $\Delta$ D (MYO5B-D).  $N \geq 9$ . \* $p < 0.001$  vs MHV M expressed with MYO5B+D. \*\* $p < 0.0001$  vs MHV M expressed with MYO5B+D. B. M-GFP proteins from PEDV, MERS and SARS-CoV-2 co-expressed with either MYO5B+D or MYO5B $\Delta$ D (MYO5B-D). \*\* $p < 0.0001$  vs M protein expressed with MYO5B+D.  $N \geq 9$ . C. Colocalization of Cherry-MYO5B+D with M-GFP chimeras for PEDV, MERS and SARS-CoV-2 compared with E to K mutants of each M protein.  $N \geq 6$ . For A, \* $p < 0.001$  versus MHV M co-expressed with MYO5B+D. For B, \* $p < 0.001$  between wild type M protein expressed with MYO5B+D vs MYO5B-D. \*\* $p < 0.0001$  between wild type M protein expressed with MYO5B+D vs MYO5B-D. For C, \* $p < 0.001$  between mutant and wild type M protein expressed with MYO5B+D. \*\* $p < 0.0001$  between mutant and wild type M protein expressed with MYO5B+D. Analysis was performed on a minimum of 3 fields from at least 3 separate experiments.



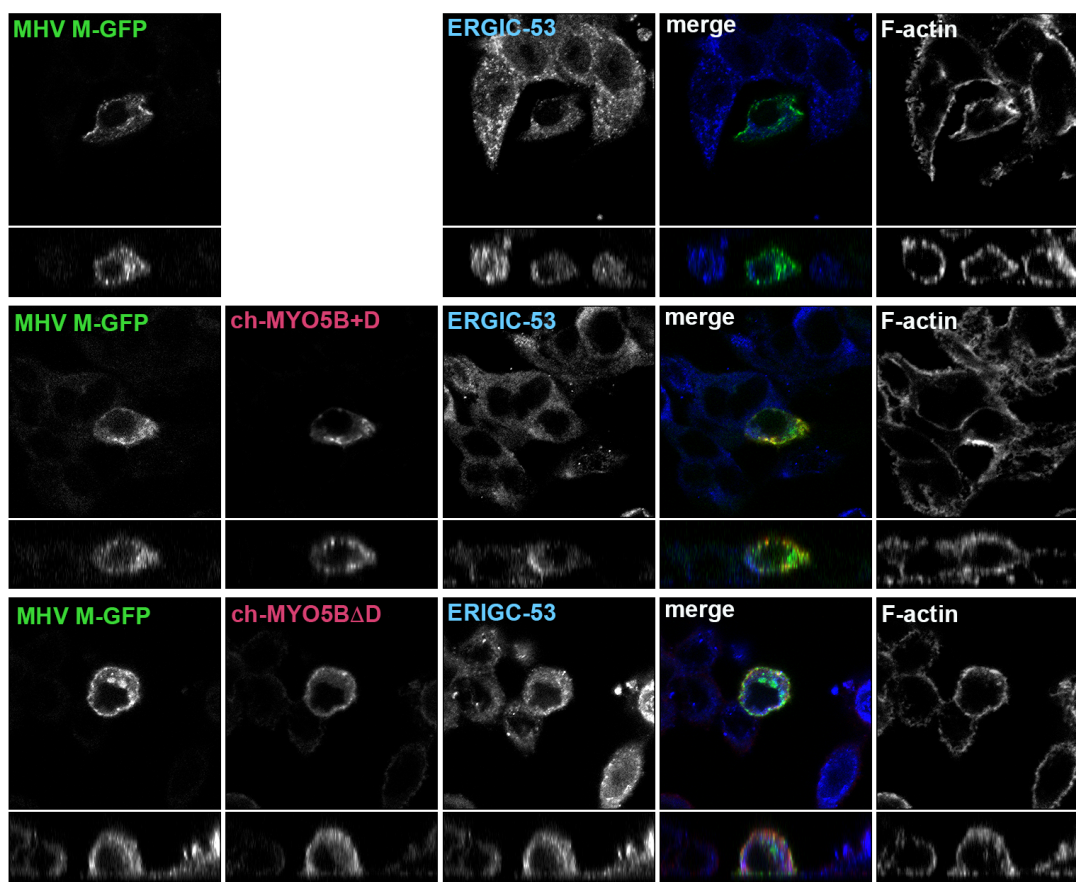

**Supplemental Figure S4: Localization of MHV M-GFP with Cherry-MYO5B+D co-expressed in A549 lung cells.** MHV M-GFP was expressed in A549 lung cells alone, with Cherry-MYO5B+D or with Cherry-MYO5B $\Delta$ D. All cells were immunostained for ERGIC-53 and for F-actin with fluorescent phalloidin. Labels on the individual panels indicate the color used to produce the three-color merged image. Panels to the right of the merged panel were not used in the production of the merged image. Z axis projections are shown below X-Y slice images, with the merged overlap at the right. Bar = 5  $\mu$ m. Results are representative of 3 individual experiments.

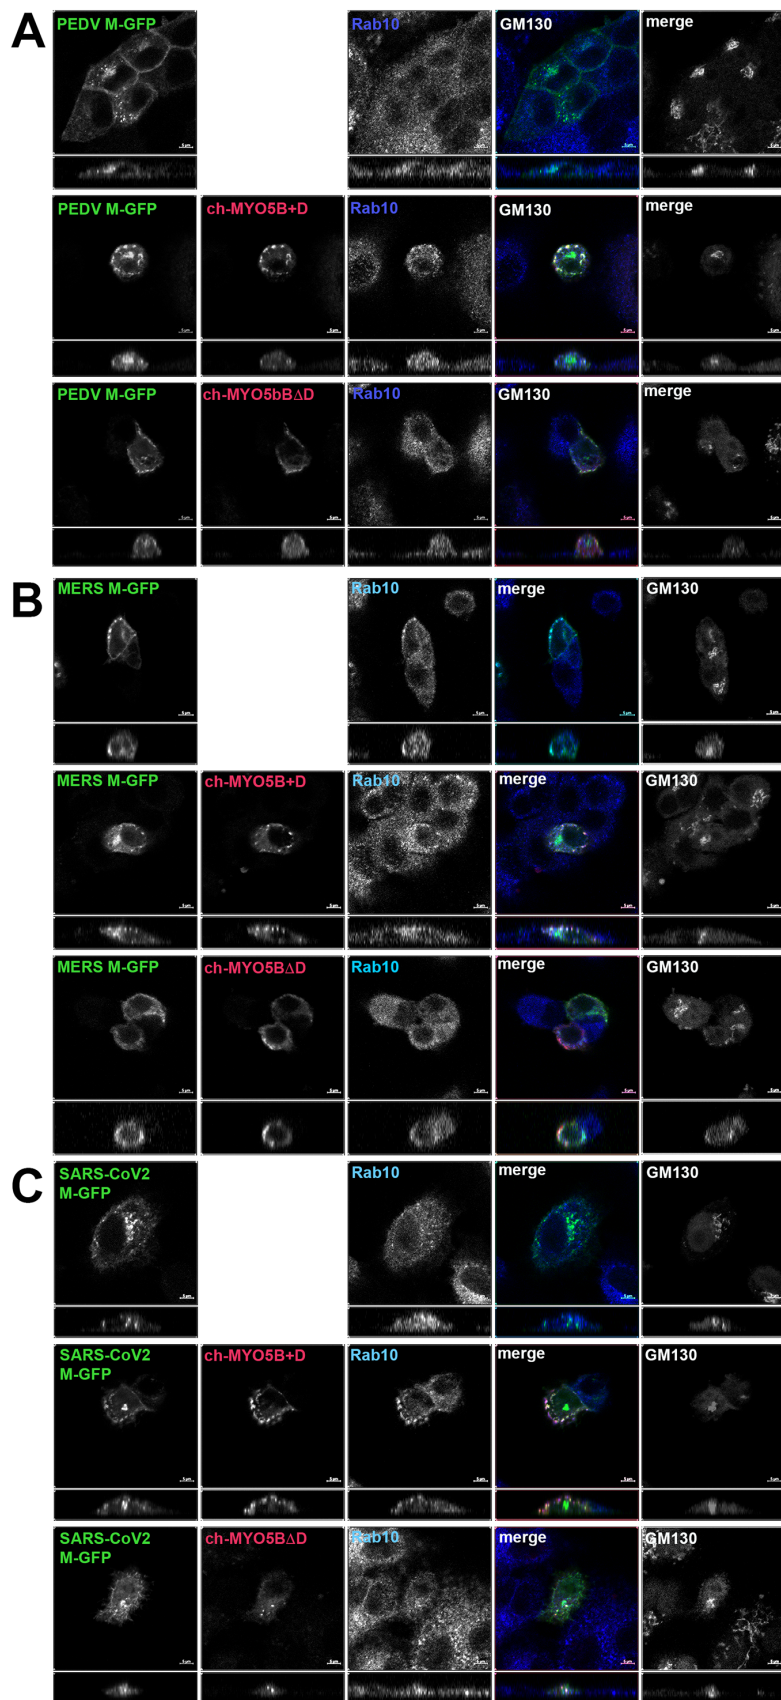

**Supplemental Figure S5: Co-localization of coronavirus M proteins with co-expressed MYO5B+D in A549 cells.** A) PEDV M-GFP, B) MERS M-GFP and C) SARS-CoV-2 M-GFP were expressed in A549 lung cells alone, with Cherry MYO5B+D or Cherry-MYO5B $\Delta$ D. All cells were co-immunostained for endogenous Rab10 and GM130 as a marker of the Golgi apparatus. Labels on the individual panels indicate the color used to produce the three-color merged image. Panels to the right of the merged panel were not used in the production of the merged image. Z axis projections are shown below X-Y slice images, with the merged overlap at the right. Bar = 5  $\mu$ m. Results are representative of 3 individual experiments.

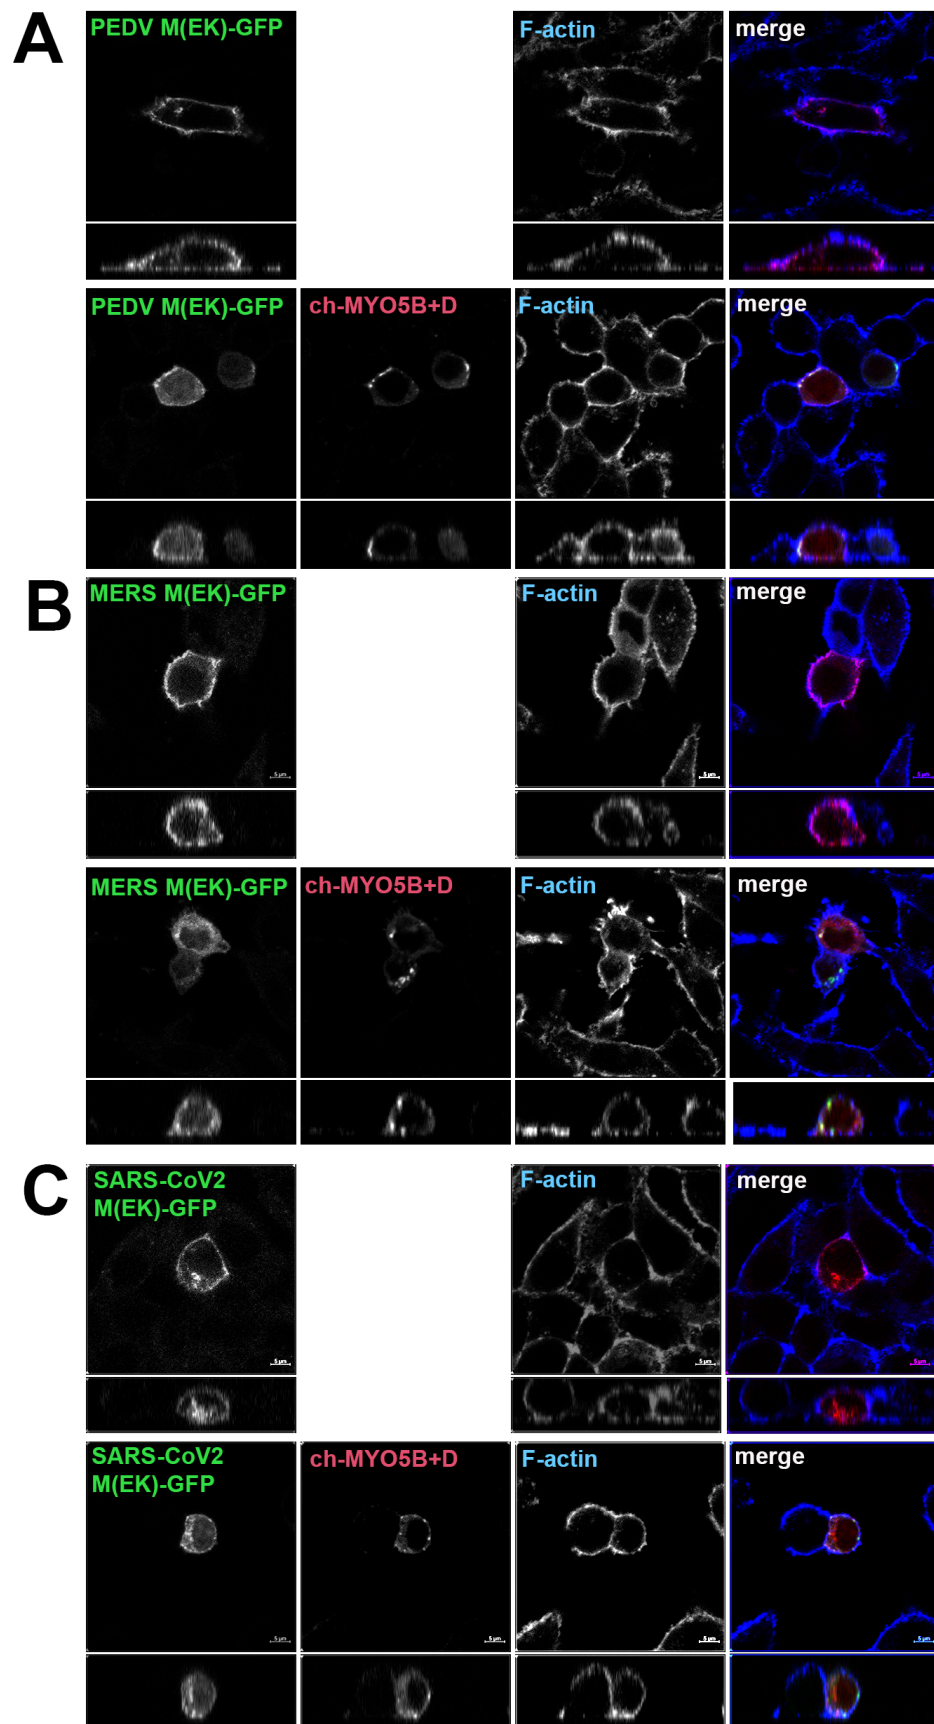

**Supplemental Figure S6: Loss of co-localization of coronavirus M proteins with co-expressed MYO5B+D with E to K mutations in A549 cells.** E to K mutants of A) PEDV M-GFP, B) MERS M-GFP and C) SARS-CoV-2 M-GFP were expressed in A549 lung cells alone or with Cherry MYO5B+D. All cells were co-stained with phalloidin to visualize F-actin. Labels on the individual panels indicate the color used to produce the merged image. Z axis projections are shown below X-Y slice images, with the merged overlap at the right. Bar = 5  $\mu$ m. Results are representative of 3 individual experiments.

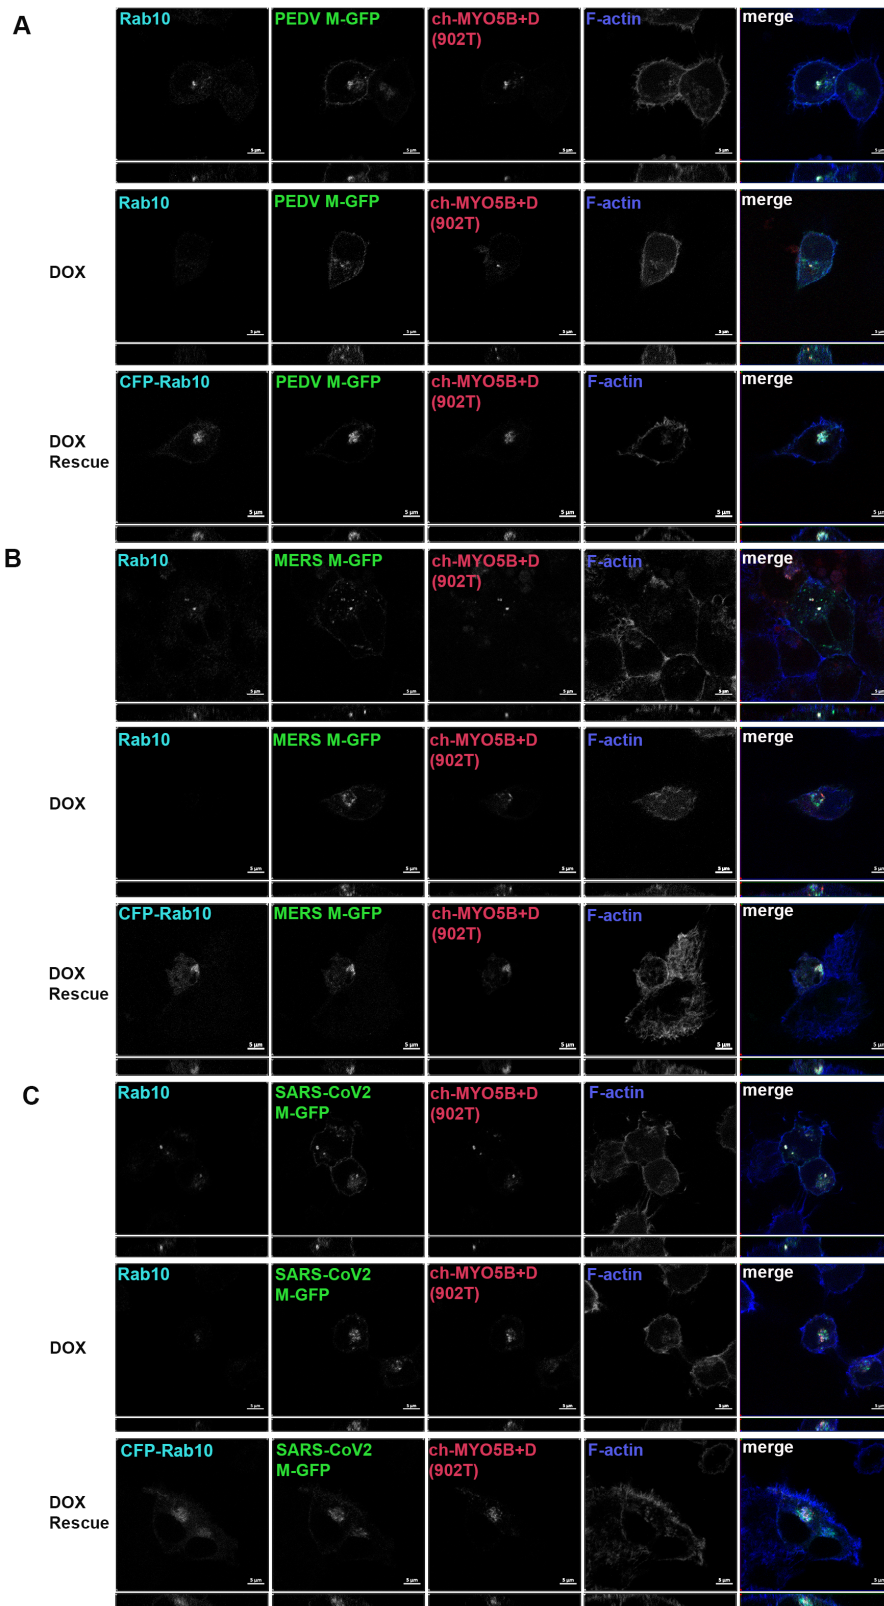



**Supplemental Figure S7: Knockdown of Rab10 expression in A549 cells alters localization of Coronavirus M proteins co-expressed with Cherry-MYO5B+D tail.**

A549 lung cells were transfected with A) PEDV M-GFP, B) MERS M-GFP and C) SARS-CoV-2 M-GFP with Cherry-MYO5B+D 902 tail (902T) in inducible Rab10 knockdown (KD) cells untreated or treated with doxycycline (DOX). One set treated Rab10 knockdown cells is rescued with the co-expression of CFP-Rab10. The untreated and treated (DOX) cells were co-immunostained for endogenous Rab10 and phalloidin. The CFP-Rab10 rescued were only stained with phalloidin. Labels on the individual panels indicate the color used to produce the three-color merged image. Panels to the right of the merged panel were not used in the production of the merged image. Z axis projections are shown below X-Y slice images, with the merged overlap at the right. Bar = 5  $\mu$ m. Results are representative of 3 individual experiments.
